# Supplementary material
Source: publisher figshare collection journal article supplement (https://wiley.figshare.com/ndownloader/files/9485998)
Supplement: Supplementary file 1 [file 9485998]

## Sheet: Pathway Heat Map
	Heat map of statistically significant biochemicals profiled in this study
	(Data normalization by Bradford quantification)
											Ratio					Mean values
	Pathway Sort Order	Super Pathway	Sub Pathway	Biochemical Name	Platform	Comp ID	KEGG	HMDB	PubChem		miRNA/Control		miRNA/Control			Control	miRNA		Chemical ID	CAS	RI	Mass
												X	p-value	q-value	X			X
	1	Amino Acid	Glycine, Serine and Threonine Metabolism	glycine	LC/MS pos	58	C00037	HMDB00123	750		0.55		0.0001	6.849e-05		0.9748	0.536		340	56-40-6	700	263.147
	6			betaine	LC/MS pos	3141	C00719	HMDB00043	247		0.81		0.0054	0.0014		1.1864	0.9614		799	107-43-7	734	118.086
	9			serine	LC/MS polar	1648	C00065	HMDB00187	5951		0.53		0.0005	0.0002		1.0049	0.5299		503	56-45-1	2988	104.035
	10			N-acetylserine	LC/MS pos	37076		HMDB02931	65249		2.04		0.0005	0.0002		0.7438	1.514		100001851	97-14-3	1021	148.06
	14			threonine	LC/MS pos	1284	C00188	HMDB00167	6288		0.71		0.0239	0.005		0.9157	0.6521		564	72-19-5	701.5	120.066
	15			N-acetylthreonine	LC/MS neg	33939	C01118		152204		1.2		0.0589	0.0107		0.81	0.9704		100001274	17093-74-2	821.6	160.062
	25		Alanine and Aspartate Metabolism	alanine	LC/MS pos	1126	C00041	HMDB00161	5950		0.63		0.0018	0.0005		0.9478	0.5988		811	56-41-7	696	90.055
	26			N-acetylalanine	LC/MS neg	1585	C02847	HMDB00766	88064		1.11		0.244	0.0362		0.9028	1		1110	97-69-8	861.2	130.051
	28			aspartate	LC/MS pos	443	C00049	HMDB00191	5960		0.37		0.0077	0.0019		0.9884	0.3641		234	56-84-8	668	134.045
	30			asparagine	LC/MS pos	512	C00152	HMDB00168	6267		1.05		0.4713	0.0626		0.9523	1		917	70-47-3	679	133.061
	32			N-acetylaspartate (NAA)	LC/MS polar	22185	C01042	HMDB00812	65065		3.78		0.0006	0.0002		0.6706	2.5361		100000787	997-55-7;997-55-7	3143	174.041
	38		Glutamate Metabolism	glutamate	LC/MS pos	57	C00025	HMDB00148	611		0.68		0.0004	0.0001		0.923	0.6284		561	56-86-0	710	148.06
	39			glutamine	LC/MS pos	53	C00064	HMDB00641	5961		1.44		0.1018	0.0171		0.7992	1.1472		563	56-85-9	680	147.076
	40			N-acetylglutamate	LC/MS pos	15720	C00624	HMDB01138	70914		8.38		0.0005	0.0002		0.5603	4.6972		100000282	5817-08-03	1492	190.071
	41			N-acetylglutamine	LC/MS pos	33943	C02716	HMDB06029	182230		3.84		0.0003	0.0001		0.688	2.6421		100001253	2490-97-3	1193	189.087
	42			N-acetyl-aspartyl-glutamate (NAAG)	LC/MS pos	35665	C12270	HMDB01067	5255		67.89		0.0002	7.3733e-05		0.5906	40.0981		100001612	3106-85-2	1575.4	305.098
	43			gamma-aminobutyrate (GABA)	LC/MS pos	1416	C00334	HMDB00112	119		1.31		0.0782	0.0136		0.742	0.9715		141	56-12-2	699	104.071
	46			4-methylglutamate	LC/MS pos	32443	C06234		5365		1.95		0.0006	0.0002		0.996	1.9434		100001128	31137-74-3	928.1	162.076
	48			glutamate, gamma-methyl ester	LC/MS pos	33487			68662		0.73		0.7198	0.0901		0.7735	0.5657		100001103	1499-55-4	1068.8	162.076
	49			pyroglutamine*	LC/MS pos	46225			134508		1.32		0.0006	0.0002		0.8708	1.1529		100001540	2353-44-8	750	129.066
	53		Histidine Metabolism	histidine	LC/MS neg	59	C00135	HMDB00177	6274		0.56		0.0005	0.0002		1.0257	0.572		355	5934-29-2	755.9	154.062
	54			N-acetylhistidine	LC/MS pos	33946	C02997	HMDB32055	75619		18.29		7.5935e-07	1.8021e-06		0.7873	14.3994		100001293	39145-52-3	848	198.087
	55			1-methylhistidine	LC/MS pos	30460	C01152	HMDB00001	92105		0.48		0.0008	0.0003		1.0888	0.5195		100001051	332-80-9	653.6	170.092
	56			3-methylhistidine	LC/MS neg	15677	C01152	HMDB00479	64969		0.82		0.9842	0.1194		0.8459	0.6926		100000042	368-16-1	906.3	168.078
	63			imidazole propionate	LC/MS pos	40730		HMDB02271	70630		1.8		0.0003	0.0001		0.8995	1.6214		100003434	1074-59-5	1020	141.066
	64			imidazole lactate	LC/MS pos	15716	C05568	HMDB02320	440129		0.11		2.5576e-09	3.4901e-08		1.9295	0.21		100000263	14403-45-3	782.7	157.061
	70			1-methylimidazoleacetate	LC/MS pos	32350	C05828	HMDB02820	75810		1.4		0.0021	0.0006		0.9252	1.2913		100001208	2625-49-2	833	141.066
	73		Lysine Metabolism	lysine	LC/MS pos	1301	C00047	HMDB00182	5962		0.6		0.0011	0.0004		1.0509	0.6273		407	56-87-1	613.8	147.113
	74			N2-acetyllysine	LC/MS pos	36751	C12989	HMDB00446	92907		0.5		0.0983	0.0166		0.6661	0.3325		100001721	1946-82-3	836	189.123
	75			N6-acetyllysine	LC/MS pos	36752	C02727	HMDB00206	92832		0.78		0.029	0.0058		1.1318	0.8846		100001734	692-04-6	1140	189.123
	76			N-6-trimethyllysine	LC/MS pos	1498	C03793	HMDB01325	440120		0.52		4.1696e-05	3.1611e-05		1.0004	0.5237		189	23284-33-5	690	189.16
	78			saccharopine	LC/MS neg	1495	C00449	HMDB00279	160556		0.27		2.9407e-05	2.4695e-05		1.1296	0.2997		392	997-68-2	640	275.125
	79			2-aminoadipate	LC/MS pos	6146	C00956	HMDB00510	469		0.82		0.554	0.072		0.6119	0.5021		381	542-32-5;1118-90-7	793.3	162.076
	82			glutarate (pentanedioate)	LC/MS polar	396	C00489	HMDB00661	743		0.69		0.0187	0.0041		0.8337	0.5742		339	110-94-1	2900	131.035
	90			pipecolate	LC/MS pos	1444	C00408	HMDB00070	849		0.22		4.2027e-06	6.093e-06		0.9902	0.2131		1025	4043-87-2	1120	130.086
	93			5-aminovalerate	LC/MS pos	18319	C00431	HMDB03355	138		1.09		0.6983	0.0876		1.074	1.1718		100000454	660-88-8	835	118.086
	98		Phenylalanine and Tyrosine Metabolism	phenylalanine	LC/MS pos	64	C00079	HMDB00159	6140		0.62		0.005	0.0013		1.0185	0.6305		460	63-91-2	2050	166.086
	103			phenyllactate (PLA)	LC/MS neg	22130	C05607	HMDB00779	3848		0.06		1.3277e-05	1.3176e-05		1.2933	0.0733		100000774	828-01-3	2208	165.056
	109			phenylacetylglycine	LC/MS neg	33945	C05598	HMDB00821	68144		2.2		0.0575	0.0105		7.5525	16.653		100001275	500-98-1	2375	192.067
	111			tyrosine	LC/MS pos	1299	C00082	HMDB00158	6057		0.65		0.0057	0.0014		0.9714	0.6276		815	60-18-4	1516.3	182.081
	121			3-(4-hydroxyphenyl)lactate	LC/MS neg	32197	C03672	HMDB00755	9378		0.34		3.3169e-07	9.529e-07		0.9997	0.3388		240	6482-98-0	1379	181.051
	126			phenol sulfate	LC/MS neg	32553	C02180	HMDB60015	74426		23.5		0.0002	0.0001		2.4954	58.6462		100001510	937-34-8	2156	172.991
	128			p-cresol sulfate	LC/MS neg	36103	C01468	HMDB11635	4615423		1.31		0.0634	0.0113		0.8876	1.1602		100001315	3233-57-7	2890	187.007
	134			o-cresol sulfate	LC/MS neg	36845			11615528		1.23		0.0945	0.0161		0.8068	0.9932		100001806		2796	187.007
	193		Tryptophan Metabolism	tryptophan	LC/MS pos	54	C00078	HMDB00929	6305		0.66		0.017	0.0037		1.0177	0.6758		565	73-22-3	2440	205.097
	197			indolelactate	LC/MS neg	18349	C02043	HMDB00671	92904		0.21		0.0002	0.0001		1.1705	0.2406		100000463	832-97-3	2286	204.067
	203			kynurenine	LC/MS pos	15140	C00328	HMDB00684	161166		0.25		0.0156	0.0035		0.8519	0.2161		100000265	2922-83-0	1902.1	209.092
	219			serotonin (5HT)	LC/MS pos	2342	C00780	HMDB00259	5202		3.02		0.0109	0.0025		0.5244	1.5822		504	153-98-0	1654	177.102
	234			C-glycosyltryptophan	LC/MS neg	48782			10981970		0.37		2.6419e-07	9.0425e-07		1.2524	0.4653		100006379	180509-18-6	1777	365.135
	237		Leucine, Isoleucine and Valine Metabolism	leucine	LC/MS pos	60	C00123	HMDB00687	6106		0.66		0.0084	0.002		0.9935	0.6516		397	61-90-5	1680.2	132.102
	238			N-acetylleucine	LC/MS neg	1587	C02710	HMDB11756	70912		0.7		0.1593	0.0254		0.9519	0.6665		1082	1188-21-2	2400	172.098
	240			4-methyl-2-oxopentanoate	LC/MS neg	22116	C00233	HMDB00695	70		0.47		0.189	0.0291		1.685	0.7932		100000551	816-66-0	2170	129.056
	245			isovalerylcarnitine	LC/MS pos	34407		HMDB00688	6426851		2.63		0.0002	9.384e-05		0.8666	2.2807		100001393	31023-24-2	2504.9	246.17
	248			beta-hydroxyisovalerate	LC/MS neg	12129		HMDB00754	69362		3.17		0.0029	0.0008		0.6883	2.179		1442	625-08-1	1027	117.056
	249			beta-hydroxyisovaleroylcarnitine	LC/MS pos	35433					0.92		0.2503	0.0369		0.9437	0.8639		100001594	99159-87-2	1701	262.165
	250			alpha-hydroxyisovaleroyl carnitine*	LC/MS pos	46263					1.11		0.2669	0.0388		0.8794	0.9796		100005836		1863	262.165
	256			alpha-hydroxyisovalerate	LC/MS polar	46537		HMDB00407	99823		0.64		0.0271	0.0055		1.4556	0.9281		100001300	600-37-3	1052	117.056
	258			methylsuccinate	LC/MS polar	15745		HMDB01844	10349		0.89		0.0368	0.0072		1.0897	0.97		2051	498-21-5	2800	131.035
	264			5-methylnorleucine	LC/MS pos	43546			94817		0.81		0.1477	0.0237		0.85	0.6903		100004549	31872-98-7	2426	146.118
	266			isoleucine	LC/MS pos	1125	C00407	HMDB00172	6306		0.65		0.0069	0.0017		0.9574	0.6261		376	73-32-5	1599	132.102
	268			N-acetylisoleucine	LC/MS neg	33967			2802421		0.63		0.0934	0.0159		0.8881	0.5558		100001276	3077-46-1	2325	172.098
	269			3-methyl-2-oxovalerate	LC/MS neg	15676	C00671	HMDB03736	47		0.45		0.1857	0.0288		1.6013	0.7252		100000036	1460-34-0;51829-07-3	2064.2	129.056
	270			2-methylbutyrylcarnitine (C5)	LC/MS pos	45095		HMDB00378	6426901		1.06		0.4571	0.0609		0.8696	0.9198		100001509	31023-25-3	2465	246.17
	272			tiglyl carnitine	LC/MS pos	35428		HMDB02366	22833596		1.08		0.3516	0.0493		0.8522	0.9233		100001597	64191-86-2	2354	244.154
	275			2-hydroxy-3-methylvalerate	LC/MS neg	36746		HMDB00317	164623		0.55		0.0022	0.0006		1.3851	0.7593		100001541	488-15-3	1800	131.071
	276			3-hydroxy-2-ethylpropionate	LC/MS neg	32397		HMDB00396	188979		0.94		0.9753	0.1186		0.6458	0.606		100001170	4374-62-3	975	117.056
	277			ethylmalonate	LC/MS polar	15765		HMDB00622	11756		1.19		0.0442	0.0084		0.8198	0.9722		2054	601-75-2	2785	131.035
	278			valine	LC/MS pos	1649	C00183	HMDB00883	6287		0.65		0.0075	0.0018		0.9675	0.6297		566	72-18-4	1042.1	118.086
	279			N-acetylvaline	LC/MS neg	1591		HMDB11757	66789		1.15		0.0331	0.0066		0.922	1.059		1084	96-81-1	1704	158.082
	281			3-methyl-2-oxobutyrate	LC/MS neg	44526	C00141	HMDB00019	49		0.51		0.2064	0.0311		1.4352	0.7276		100000936	3715-29-5	1465	115.04
	282			isobutyrylcarnitine	LC/MS pos	33441		HMDB00736	168379		2.27		0.0002	7.5114e-05		0.7893	1.7953		100001055	25518-49-4	1955.1	232.154
	284			3-hydroxyisobutyrate	LC/MS polar	1549	C06001	HMDB00336	87		1.13		0.2456	0.0363		0.9912	1.1188		111	2068-83-9	1619.1	103.04
	285			alpha-hydroxyisocaproate	LC/MS neg	22132	C03264	HMDB00746	83697		0.4		0.0009	0.0003		1.5748	0.6255		100000706	10303-64-7	1840	131.071
	290		Methionine, Cysteine, SAM and Taurine Metabolism	methionine	LC/MS pos	1302	C00073	HMDB00696	6137		0.65		0.0157	0.0035		1.0237	0.661		415	63-68-3	1250	150.058
	291			N-acetylmethionine	LC/MS neg	1589	C02712	HMDB11745	448580		1.16		0.2201	0.033		0.9761	1.1321		1083	65-82-7	1787	190.054
	292			N-formylmethionine	LC/MS neg	2829	C03145	HMDB01015	439750		0.36		5.4922e-06	6.9341e-06		1.0291	0.3672		194	4289-98-9	1543.8	176.039
	294			methionine sulfone	LC/MS polar	44878			69961		0.31		0.009	0.0021		1.0625	0.3264		100004635	820-10-0	1880	180.034
	295			methionine sulfoxide	LC/MS polar	18374	C02989	HMDB02005	158980		0.52		0.052	0.0096		1.0544	0.5505		100000039	3226-65-1	2698	164.039
	296			N-acetylmethionine sulfoxide	LC/MS neg	45428			193368		1.61		0.0114	0.0026		1.0722	1.7314		100005463		942	206.049
	297			S-adenosylmethionine (SAM)	LC/MS pos	15915	C00019	HMDB01185	34755		0.48		5.6897e-05	3.9313e-05		1.01	0.4815		1263	24346-00-7;86867-01-8;86867-0108	670	399.145
	298			S-adenosylhomocysteine (SAH)	LC/MS neg	42382	C00021	HMDB00939	439155		0.35		6.2313e-05	4.0493e-05		1.0064	0.3474		197	979-92-0	1832.4	383.114
	302			cystathionine	LC/MS pos	15705	C02291	HMDB00099	439258		5.56		9.3461e-05	5.2057e-05		0.912	5.0742		310	535-34-2	674.7	223.075
	305			2-aminobutyrate	GC/MS	1577	C02261	HMDB00650	439691		0.55		0.1965	0.03		0.912	0.4981		1128	1492-24-6	1215.7	130
	306			2-hydroxybutyrate (AHB)	GC/MS	21044	C05984	HMDB00008	440864		2.13		6.4467e-05	4.1399e-05		0.7192	1.5352		100000933	3347-90-8	1169.4	131
	307			cysteine	LC/MS pos	1868	C00097	HMDB00574	5862		0.22		2.715e-05	2.3156e-05		0.8278	0.1817		800	52-90-4;56-89-3	736.4	122.027
	308			N-acetylcysteine	LC/MS neg	1586	C06809	HMDB01890	12035		0.68		0.1662	0.0262		1.1681	0.7933		1107	616-91-1	1108	162.023
	309			cystine	LC/MS pos	56	C00491	HMDB00192	67678		0.09		2.9942e-05	2.4764e-05		1.0139	0.0946		279	56-89-3	675	241.031
	315			cysteine sulfinic acid	LC/MS neg	37443	C00606	HMDB00996	109		0.42		0.0101	0.0024		0.6645	0.28		100002113	207121-48-0	637.5	152.002
	316			hypotaurine	LC/MS polar	590	C00519	HMDB00965	107812		2.11		1.9179e-05	1.7448e-05		0.8806	1.8593		358	300-84-5	2763.4	108.012
	317			taurine	LC/MS neg	2125	C00245	HMDB00251	1123		0.7		0.0007	0.0003		0.9635	0.6791		512	107-35-7	690	124.007
	318			N-acetyltaurine	LC/MS neg	48187			159864		0.73		0.2541	0.0373		1.1532	0.8418		100005466		800	166.018
	324		Urea cycle; Arginine and Proline Metabolism	arginine	LC/MS pos	1638	C00062	HMDB00517	232		0.52		0.0002	7.3643e-05		1.0371	0.5345		231	1119-34-2	700	175.119
	325			urea	LC/MS pos	1670	C00086	HMDB00294	1176		0.86		0.3109	0.0444		0.9778	0.845		533	57-13-6	739	121.072
	326			ornithine	LC/MS pos	1493	C00077	HMDB03374	6262		1.07		0.4138	0.0569		0.8909	0.9558		444	3184-13-2	614	133.097
	327			proline	LC/MS pos	1898	C00148	HMDB00162	145742		0.51		9.5956e-06	1.0475e-05		1.082	0.5556		480	147-85-3	805	116.071
	328			citrulline	LC/MS pos	2132	C00327	HMDB00904	9750		0.49		0.0096	0.0023		0.9577	0.474		391	372-75-8	730.3	176.103
	329			argininosuccinate	LC/MS polar	15497	C03406	HMDB00052	16950;828		0.5		6.1715e-05	4.0493e-05		1.1664	0.5809		232	156637-58-0	4311	289.115
	331			homocitrulline	LC/MS pos	22138	C02427	HMDB00679	65072		0.23		0.0006	0.0002		1.1112	0.2534		100000963	1190-49-4	821.7	190.119
	335			dimethylarginine (SDMA + ADMA)	LC/MS pos	36808	C03626	HMDB01539	123831		2.5		1.6781e-06	3.2713e-06		0.9162	2.291		100001810	102783-24-4	810	203.15
	336			N-acetylarginine	LC/MS pos	33953	C02562	HMDB04620	67427		0.61		0.051	0.0094		0.8704	0.5281		100001266	155-84-0	1116	217.13
	339			N-delta-acetylornithine	LC/MS pos	43249			9920500		0.39		0.0002	8.5509e-05		1.1158	0.433		100004523		887	175.108
	343			N-methylproline	LC/MS pos	37431			557		1.17		0.4419	0.0594		0.9671	1.1299		100001956	475-11-6	831	130.086
	345			trans-4-hydroxyproline	LC/MS pos	32306	C01157	HMDB00725	5810		0.42		0.0002	7.5114e-05		1.1086	0.4669		1001	51-35-4	685	132.066
	352		Creatine Metabolism	creatine	LC/MS pos	27718	C00300	HMDB00064	586		2.49		7.5696e-05	4.4592e-05		0.7212	1.7926		1221	57-00-1	771	132.077
	353			creatinine	LC/MS pos	513	C00791	HMDB00562	588		1.4		0.0007	0.0002		0.8596	1.2019		275	60-27-5	730.8	114.066
	355			creatine phosphate	LC/MS polar	33951	C02305	HMDB01511	587		0.09		5.4596e-05	3.8207e-05		0.9299	0.0795		100000112	922-32-7	3831	210.029
	358			guanidinoacetate	LC/MS pos	43802	C00581	HMDB00128	763		0.57		0.0819	0.0141		1.0659	0.603		344	352-97-6	711.2	118.061
	362		Polyamine Metabolism	putrescine	LC/MS pos	1408	C00134	HMDB01414	1045		0.07		0.0002	9.9673e-05		0.8025	0.0542		49	110-60-1	564	89.1073
	363			spermine	LC/MS pos	603	C00750	HMDB01256	1103		1.33		0.6597	0.0837		1.3115	1.7392		507	71-44-3	500.4	203.223
	364			spermidine	LC/MS pos	485	C00315	HMDB01257	1102		1.05		0.6753	0.0849		0.8496	0.896		50	124-20-9	533.5	146.165
	365			5-methylthioadenosine (MTA)	LC/MS pos	1419	C00170	HMDB01173	439176		1.02		0.6684	0.0845		1.0485	1.0745		212	2457-80-9	2444.9	298.097
	368			N-acetylputrescine	LC/MS pos	37496	C02714	HMDB02064	122356		0.14		8.4012e-05	4.7769e-05		0.8982	0.1271		192	18233-70-0	840	131.118
	369			4-acetamidobutanoate	LC/MS pos	1558	C02946	HMDB03681	18189		0.79		0.0097	0.0023		1.0361	0.8143		1113	3025-96-5	1721.3	146.081
	374		Guanidino and Acetamido Metabolism	4-guanidinobutanoate	LC/MS pos	15681	C01035	HMDB03464	500		0.67		0.0002	7.4249e-05		1.0488	0.7044		100000096	463-003;463-00-3	1150	146.092
	376		Glutathione Metabolism	glutathione, reduced (GSH)	LC/MS neg	2127	C00051	HMDB00125	124886		2.23		0.0001	7.1619e-05		0.6438	1.4327		496	70-18-8	790	306.077
	377			glutathione, oxidized (GSSG)	LC/MS pos	38783	C00127	HMDB03337	65359		6.99		1.2347e-08	1.3126e-07		0.4163	2.9105		448	103239-24-3	1512	307.083
	379			cysteine-glutathione disulfide	LC/MS pos	35159		HMDB00656	4247235		1.41		0.0339	0.0067		0.7083	0.9962		100001437	13081-14-6	824	214.051
	380			S-methylglutathione	LC/MS neg	33944	C11347		3605667		2.93		0.0103	0.0024		0.6602	1.937		100001259	2922-56-7	1075	320.092
	382			cysteinylglycine	LC/MS pos	35637	C01419	HMDB00078	439498		0.44		0.0457	0.0086		0.6993	0.3072		278	19246-18-5	790	179.048
	384			5-oxoproline	LC/MS neg	1494	C01879	HMDB00267	7405		1.07		0.4082	0.0563		0.9023	0.9667		1021	98-79-3	738.5	128.035
	385			ophthalmate	LC/MS pos	34592		HMDB05765	7018721		0.17		0.0453	0.0086		0.8479	0.145		100001311	495-27-2	1462	290.135
	387			S-nitrosoglutathione (GSNO)	LC/MS pos	47127		HMDB04645	3514		4.44		0.0034	0.0009		0.2818	1.2515		100004662	57564-91-7	1748	337.081
	392	Peptide	Gamma-glutamyl Amino Acid	gamma-glutamylalanine	LC/MS pos	37063		HMDB29142	440103		0.1		3.0157e-07	9.1451e-07		0.8906	0.0922		100001843	5875-41-2	1116	219.098
	393			gamma-glutamylcysteine	LC/MS pos	1778	C00669	HMDB01049	842		1.06		0.5129	0.0673		0.6622	0.7001		1036	636-58-8	1263.5	251.07
	394			gamma-glutamylglutamate	LC/MS pos	36738	C05282	HMDB11737	92865		0.61		8.3115e-05	4.7756e-05		0.6909	0.4216		331	1116-22-9	1045	277.103
	395			gamma-glutamylglutamine	LC/MS pos	2730	C05283	HMDB11738	150914		0.27		0.0385	0.0075		0.7762	0.2115		1140	10148-81-9	817.9	276.119
	398			gamma-glutamylisoleucine*	LC/MS neg	34457		HMDB11170	14253342		0.92		0.5278	0.0689		0.7647	0.7054		100001485		1585	259.13
	399			gamma-glutamylleucine	LC/MS neg	18369		HMDB11171	151023		0.52		0.001	0.0003		0.8164	0.4232		1268	2566-39-4	1636.5	259.13
	401			gamma-glutamylmethionine	LC/MS pos	44872		HMDB29155	7009567		0.19		2.0173e-06	3.7103e-06		0.8037	0.1547		100001313	17663-87-5	2016.5	279.101
	402			gamma-glutamylphenylalanine	LC/MS pos	33422		HMDB00594	111299		0.4		0.0002	9.384e-05		0.6846	0.2767		100000491	7432-24-8	2865	295.129
	403			gamma-glutamylthreonine*	LC/MS pos	33364		HMDB29159			0.76		0.3252	0.046		0.8898	0.6801		100001314	5652-48-2	996.6	249.108
	405			gamma-glutamyltyrosine	LC/MS neg	2734		HMDB11741	94340		0.24		5.62e-06	6.9341e-06		0.7341	0.1729		1102	7432-23-7	1240	309.109
	406			gamma-glutamylvaline	LC/MS pos	43829		HMDB11172	7015683		0.75		0.0882	0.0151		0.8039	0.6069		100001126	2746-34-1	2045	247.129
	408		Dipeptide Derivative	carnosine	LC/MS neg	1768	C00386	HMDB00033	439224		1.39		0.0038	0.001		0.9838	1.3638		249	305-84-0	804	225.099
	422		Dipeptide	alanylleucine	LC/MS pos	37093		HMDB28691	259583		0.42		0.0028	0.0008		0.9582	0.402		100001890	1638-60-4	2165	203.139
	493			glutamine-leucine	LC/MS pos	42994					0.42		0.072	0.0127		0.9363	0.3952		100003160		2195	260.16
	505			glycylisoleucine	LC/MS pos	36659		HMDB28844	88079		0.27		0.0015	0.0005		1.115	0.3062		100001790	19461-38-2	2080	189.123
	506			glycylleucine	LC/MS pos	34398	C02155	HMDB00759	92843		0.56		4.5451e-06	6.2024e-06		1.0313	0.574		100001258	869-19-2	2190.9	189.123
	516			glycylvaline	LC/MS pos	18357		HMDB28854	97417		0.64		0.0615	0.0111		1.1938	0.7606		100000487	1963-21-9	1561.6	175.108
	540			isoleucylglycine	LC/MS pos	40008			342532		0.77		0.5581	0.0724		1.2946	0.9919		100003169	868-28-0	1740	189.123
	558			leucylglycine	LC/MS pos	40045			79070		0.27		4.2417e-06	6.093e-06		0.9719	0.2657		100003185	686-50-0	1805	189.123
	606			phenylalanylalanine	LC/MS pos	41374			6993123;5488196		0.21		7.0049e-05	4.345e-05		1.1236	0.2337		100003589	3918-87-4	2120	237.123
	610			phenylalanylglycine	LC/MS pos	41370			98207		0.6		0.1066	0.0177		1.3161	0.7864		100003588	721-90-4	2155	223.108
	627			prolylglycine	LC/MS pos	40703			7408076;6426709		1.75		0.0096	0.0023		0.8923	1.5656		100003674	2578-57-6	875	173.092
	706			valylglycine	LC/MS pos	40475			136487		0.33		5.3868e-05	3.8187e-05		1.1223	0.3732		100003641	686-43-1	1372	175.108
	709			valylleucine	LC/MS pos	39994			352039		0.21		0.0001	6.2558e-05		0.9056	0.1915		100003210	22906-55-4	2562	231.17
	720			leucylglutamine*	LC/MS pos	48189			4305457		0.47		0.0597	0.0108		0.6358	0.3006		100003183		1578	260.161
	795	Carbohydrate	Glycolysis, Gluconeogenesis, and Pyruvate Metabolism	glucose	LC/MS polar	20488	C00031	HMDB00122	79025		0.01		2.5187e-05	2.2175e-05		1.6137	0.0117		572	50-99-7	2342	179.056
	796			glucose-6-phosphate (G6P)	LC/MS polar	31260	C00668	HMDB01401	5958		0.15		0.0001	6.2558e-05		1.0713	0.157		291	103192-55-8	4537	259.022
	797			glucose 1-phosphate	GC/MS	33755	C00103	HMDB01586	65533		0.12		4.4472e-05	3.2366e-05		1.0125	0.1259		1233	56401-20-8	1853	217.1
	799			fructose-6-phosphate	LC/MS polar	12021	C05345	HMDB00124	69507		0.26		1.6385e-06	3.2713e-06		1.6937	0.4352		1232	103213-47-4	4261.4	259.022
	802			Isobar: fructose 1,6-diphosphate, glucose 1,6-diphosphate, myo-inositol 1,4 or 1,3-diphosphate	LC/MS neg	46896					0.07		1.6647e-05	1.5941e-05		1.2435	0.0857		100002180		551	338.989
	804			dihydroxyacetone phosphate (DHAP)	LC/MS neg	15522	C00111	HMDB01473	668		2.7		0.0176	0.0038		0.459	1.2389		309	102783-56-2	603	168.991
	809			3-phosphoglycerate	LC/MS neg	1414	C00597	HMDB00807	724		0.23		0.0003	0.0001		1.4416	0.3249		132	80731-10-8	583	184.986
	810			phosphoenolpyruvate (PEP)	LC/MS neg	597	C00074	HMDB00263	1005		0.13		0.0049	0.0013		1.5406	0.1981		463	10526-80-4	587.3	166.975
	811			pyruvate	LC/MS polar	22250	C00022	HMDB00243	1060		2.51		0.0001	6.849e-05		0.783	1.9634		823	127-17-3	2650	175.025
	812			lactate	LC/MS neg	527	C00186	HMDB00190	612		0.71		0.0142	0.0032		1.002	0.7066		482	79-33-4	681.6	89.0244
	815			glycerate	LC/MS polar	1572	C00258	HMDB00139	752		0.12		1.0111e-05	1.0614e-05		1.8314	0.2189		1052	600-19-1	2070.4	105.019
	818		Pentose Phosphate Pathway	6-phosphogluconate	LC/MS neg	15442	C00345	HMDB01316	91493		0.01		0.0001	5.9117e-05		1.6003	0.0149		100000341	921-62-0;53411-70-4	583.9	275.017
	821			ribose 1-phosphate	LC/MS polar	1763	C00620	HMDB01489	439236		1.43		0.0739	0.013		0.8973	1.2862		219	50-99-7;58459-37-3	4025	229.012
	822			5-phosphoribosyl diphosphate (PRPP)	LC/MS neg	36840	C00119	HMDB00280	7339		0.02		1.6434e-05	1.5941e-05		1.8243	0.0424		166	108321-05-7	570	308.978
	823			sedoheptulose-7-phosphate	LC/MS neg	35649	C05382	HMDB01068	616		0.56		0.0001	6.5602e-05		1.0021	0.5631		100001628	2646-35-7	599.6	289.033
	825			ribulose/xylulose 5-phosphate	GC/MS	37288	C00199				0.14		1.7232e-05	1.6218e-05		1.0727	0.1467		100002179		1935	357.2
	828		Pentose Metabolism	ribulose	GC/MS	35855	C00309	HMDB00621	151261		0.23		0.0127	0.0029		1.0707	0.2417		100000147	488-84-6	1662	306.1
	830			ribose	LC/MS polar	1471	C00121	HMDB00283	5779		0.14		0.0005	0.0002		1.1535	0.1598		914	50-69-1	1508.2	195.051
	831			ribitol	LC/MS polar	15772	C00474	HMDB00508	6912		6.58		4.1659e-06	6.093e-06		1.0546	6.9418		100000406	488-81-3	1789.6	151.061
	832			ribonate	LC/MS polar	27731	C01685	HMDB00867	5460677		0.3		5.8566e-05	3.996e-05		0.8895	0.2671		100001007	5336-08-03	2425	165.04
	835			xylonate	GC/MS	35638	C05411	HMDB60256	6602431		0.35		0.0232	0.0049		0.9506	0.3284		100001627	73686-31-7	1722	292
	837			xylitol	GC/MS	4966	C00379	HMDB02917	6912		0.12		0.0007	0.0003		1.3595	0.1625		543	87-99-0	1677.6	307.2
	838			arabinose	GC/MS	575	C00216	HMDB00646	66308		1.01		0.8176	0.1012		0.3333	0.3368		828	28697-53-2	1631.6	217
	843			arabitol	GC/MS	38075	C01904	HMDB00568	94154		1.44		0.0483	0.009		0.9298	1.337		100000012	7643-75-6	1687.5	307.1
	849			fucose	GC/MS	15821	C01018	HMDB00174	19466		0.72		0.2583	0.0377		1.0431	0.7528		918	2438-80-4	1682.2	204
	858		Glycogen Metabolism	maltotetraose	LC/MS neg	15910	C02052	HMDB01296	446495		0.05		4.2799e-05	3.1649e-05		0.9066	0.0495		100000275	34612-38-9	910	665.215
	860			maltotriose	LC/MS neg	44688	C01835	HMDB01262	439586		0.22		0.0081	0.002		0.9624	0.2098		100000276	1109-28-0	812	503.162
	867		Disaccharides and Oligosaccharides	lactose	LC/MS polar	567	C00243	HMDB00186	84571		1.17		0.1192	0.0196		0.9528	1.1187		393	5965-66-2	3500	387.114
	899		Fructose, Mannose and Galactose Metabolism	fructose	LC/MS polar	577	C00095	HMDB00660	5984		0.21		0.001	0.0003		1.8434	0.3947		878	57-48-7	2022.2	179.056
	902			sorbitol	GC/MS	15053	C00794	HMDB00247	5780		1.24		0.1884	0.029		1.4121	1.7463		506	6706-59-8	1843	319.1
	909			mannitol	GC/MS	15335	C00392	HMDB00765	6251		0.85		0.177	0.0275		1.1405	0.9647		100000277	69-65-8	1839	319.1
	923			galactonate	LC/MS polar	27719	C00880	HMDB00565	128869		2.83		0.1866	0.0289		0.8055	2.278		100001026	299-28-5	3085	195.051
	927		Nucleotide Sugar	UDP-glucose	LC/MS polar	32344	C00029	HMDB00286	8629		0.1		3.9719e-06	6.093e-06		0.9558	0.0952		1096	117756-22-6	3950	565.048
	931			UDP-galactose	LC/MS polar	15860	C00052	HMDB00302	18068		0.29		0.0001	6.2558e-05		1.0408	0.3002		100000298	2956-16-3;91183-98-1;137868-52-1	4000	565.048
	932			UDP-glucuronate	LC/MS neg	2763	C00167	HMDB00935	17473		0.09		4.3121e-07	1.0699e-06		0.8573	0.0812		1097	28053-08-9;63700-19-6	588	579.027
	934			guanosine 5'-diphospho-fucose	LC/MS neg	15903					0.54		5.1197e-06	6.6537e-06		1.0161	0.5485		335	15839-70-0	755	588.075
	936			UDP-N-acetylglucosamine	LC/MS polar	35162	C00043	HMDB00290	445675		0.27		2.4283e-07	9.0425e-07		0.9767	0.2628		1249	91183-98-1	3708.7	606.074
	939			cytidine 5'-monophospho-N-acetylneuraminic acid	LC/MS polar	36831	C00128	HMDB01176	448209		0.29		7.542e-05	4.4592e-05		0.9269	0.2708		1223	3063-71-6	3900	613.14
	944		Aminosugar Metabolism	glucosamine-6-phosphate	LC/MS polar	580	C00352	HMDB01254	439217		0.2		0.0368	0.0072		0.9223	0.1846		290	3616-42-0	4521.5	258.038
	948			glucuronate	LC/MS polar	15443	C00191	HMDB00127	444791		0.54		9.7484e-05	5.3212e-05		0.8975	0.4859		100000257	207300-70-7	3233.3	193.035
	951			N-acetylglucosamine	GC/MS	15095	C00140	HMDB00215	24139		0.49		0.0273	0.0056		1.3888	0.6766		100000281	7512-17-6	1903.3	245
	952			N-acetylglucosamine 6-phosphate	LC/MS polar	15107	C00357	HMDB02817	439219		0.08		1.7002e-09	3.0934e-08		1.0563	0.0835		1213	102029-88-9	4114	300.049
	953			N-acetyl-glucosamine 1-phosphate	LC/MS polar	15741	C04256	HMDB01367	440364		0.1		2.0392e-06	3.7103e-06		1.3554	0.1307		1212	31281-59-1	4052	300.049
	959			N-acetylneuraminate	LC/MS polar	32377	C00270	HMDB00230	439197		0.32		4.0744e-08	2.78e-07		1.0841	0.3467		1162	131-48-6	3072.6	308.099
	971			erythronate*	LC/MS polar	42420		HMDB00613	2781043		0.45		0.0018	0.0005		0.8069	0.3602		100001320	88759-55-1	2186	135.03
	978	Energy	TCA Cycle	citrate	LC/MS neg	1564	C00158	HMDB00094	311		1.82		0.0053	0.0014		1.057	1.9279		1124	77-92-9	582	191.02
	983			alpha-ketoglutarate	LC/MS polar	528	C00026	HMDB00208	51		0.84		0.2671	0.0388		0.9484	0.7956		93	305-72-6;328-50-7;22202-68-2	2700	145.014
	985			succinylcarnitine	LC/MS pos	37058					0.36		8.9547e-07	2.0366e-06		0.8376	0.3045		100001948		1419	262.129
	986			succinate	LC/MS polar	1437	C00042	HMDB00254	1110		0.38		1.7548e-07	7.9741e-07		1.0809	0.4065		252	110-15-6	3149	117.019
	987			fumarate	LC/MS polar	1643	C00122	HMDB00134	444972		0.83		0.002	0.0006		0.9829	0.8183		330	100-17-8	3084	115.004
	988			malate	LC/MS polar	1303	C00149	HMDB00156	525		0.83		0.0007	0.0002		0.9688	0.8062		409	6915-15-7	3343.1	133.014
	998			2-methylcitrate/homocitrate	LC/MS neg	52282					3.11		0.0108	0.0025		0.8171	2.5418		100008929		575	205.035
	999		Oxidative Phosphorylation	acetylphosphate	LC/MS polar	15488	C00227	HMDB01494	186		0.45		0.0134	0.003		0.935	0.4241		1211	94249-01-1	4013.9	138.98
	1001			phosphate	LC/MS neg	42109	C00009	HMDB01429	1061		0.89		0.0274	0.0056		1.1556	1.0321		461	7664-38-2	608	96.9696
	1004	Lipid	Medium Chain Fatty Acid	heptanoate (7:0)	LC/MS neg	1644	C17714	HMDB00666	8094		0.61		0.0743	0.013		0.8652	0.524		925	111-14-8	3670	129.092
	1011			5-dodecenoate (12:1n7)	LC/MS neg	33968		HMDB00529	5312378		0.88		0.6451	0.0823		0.7395	0.6494		100001232	2430-94-6	5224	197.155
	1013		Long Chain Fatty Acid	myristate (14:0)	LC/MS neg	1365	C06424	HMDB00806	11005		0.55		0.0014	0.0004		0.9499	0.5192		519	544-63-8	5440	227.202
	1014			myristoleate (14:1n5)	LC/MS neg	32418	C08322	HMDB02000	5281119		0.3		0.0024	0.0007		0.733	0.2208		100001198	544-64-9	5346.9	225.186
	1016			palmitate (16:0)	LC/MS neg	1336	C00249	HMDB00220	985		0.83		0.1987	0.0302		0.8872	0.7379		424	57-10-3	5618	255.233
	1017			palmitoleate (16:1n7)	LC/MS neg	33447	C08362	HMDB03229	445638		0.25		0.0002	0.0001		0.8207	0.2029		452	373-49-9	5475	253.217
	1019			margarate (17:0)	LC/MS neg	1121		HMDB02259	10465		0.83		0.1741	0.0272		0.9103	0.7537		891	506-12-7	5731	269.249
	1020			10-heptadecenoate (17:1n7)	LC/MS neg	33971		HMDB60038	5312435		0.45		0.0208	0.0044		0.7414	0.3318		100001278	29743-97-3	5555	267.233
	1021			stearate (18:0)	LC/MS neg	1358	C01530	HMDB00827	5281		0.79		0.0624	0.0112		0.9074	0.7179		439	57-11-4	5872	283.264
	1023			oleate (18:1n9)	GC/MS	1359	C00712	HMDB00207	445639		0.99		0.8825	0.1085		1.0257	1.012		442	112-80-1	1984.4	339.2
	1025			cis-vaccenate (18:1n7)	GC/MS	33970	C08367	HMDB03231	5282761		1.57		1.9801e-05	1.7719e-05		0.8937	1.4024		100001228	506-17-2	1987	339.3
	1029			nonadecanoate (19:0)	LC/MS neg	1356	C16535	HMDB00772	12591		0.9		0.3505	0.0493		0.9212	0.8334		892	646-30-0	6068	297.28
	1030			10-nonadecenoate (19:1n9)	LC/MS neg	33972		HMDB13622	5312513		1.24		0.2019	0.0305		0.7951	0.9864		100001277	73033-09-7	5780	295.264
	1032			arachidate (20:0)	LC/MS neg	1118	C06425	HMDB02212	10467		1.2		0.2377	0.0355		1.0061	1.2112		893	506-30-9	6295	311.296
	1035			eicosenoate (20:1n9 or 11)	LC/MS neg	33587		HMDB02231	5282768		1.46		0.0164	0.0036		0.8318	1.2135		100001335		5950	309.28
	1039			erucate (22:1n9)	LC/MS neg	1552	C08316	HMDB02068	5281116		2.24		0.0033	0.0009		0.7126	1.5981		1087	112-86-7	6355.6	337.311
	1049		Polyunsaturated Fatty Acid (n3 and n6)	eicosapentaenoate (EPA; 20:5n3)	LC/MS neg	18467	C06428	HMDB01999	446284		0.59		0.1529	0.0245		1.8061	1.0641		2050	10-2005-9;10417-94-4	5450	301.217
	1050			docosapentaenoate (n3 DPA; 22:5n3)	LC/MS neg	32504	C16513	HMDB01976	6441454		0.37		0.0051	0.0013		1.3677	0.502		100001181	2234-74-4	5571	329.249
	1051			docosahexaenoate (DHA; 22:6n3)	LC/MS neg	44675	C06429	HMDB02183	445580		0.56		0.0269	0.0055		1.2888	0.7258		100000665	6217-54-5	5525	327.233
	1055			linoleate (18:2n6)	LC/MS neg	1105	C01595	HMDB00673	5280450		0.77		0.3193	0.0453		0.8278	0.6344		180	60-33-3	5535	279.233
	1057			linolenate [alpha or gamma; (18:3n3 or 6)]	LC/MS neg	34035	C06426	HMDB03073	5280934		0.48		0.0044	0.0012		0.9605	0.4654		100001337		5450	277.217
	1059			dihomo-linolenate (20:3n3 or n6)	LC/MS neg	35718	C03242	HMDB02925	5280581		0.36		0.0046	0.0012		1.9042	0.6822		100001739	17046-59-2	5596	305.249
	1060			arachidonate (20:4n6)	LC/MS neg	1110	C00219	HMDB01043	444899		0.49		0.0767	0.0134		1.7813	0.879		229	506-32-1	5535	303.233
	1061			adrenate (22:4n6)	LC/MS neg	32980	C16527	HMDB02226	5497181		0.34		0.1676	0.0264		1.7182	0.5766		100001193	2091-25-0	5678	331.264
	1063			docosadienoate (22:2n6)	LC/MS neg	32415	C16533	HMDB61714	5282807		4.26		1.3142e-05	1.3176e-05		0.7187	3.0634		100001182	7370-49-2	6034	335.296
	1064			dihomo-linoleate (20:2n6)	LC/MS neg	17805	C16525	HMDB05060	6439848		2.1		0.0041	0.0011		0.8581	1.8027		1231	2091-39-6	5730	307.264
	1066			mead acid (20:3n9)	LC/MS neg	35174		HMDB10378	5312531		1.28		0.3732	0.0518		1.0488	1.3408		100001472	20590-32-3	5650	305.249
	1117		Fatty Acid, Branched	15-methylpalmitate (isobar with 2-methylpalmitate)	LC/MS neg	38768			17903417		0.94		0.8903	0.1092		0.8449	0.7979		100002945		5695	269.249
	1120			17-methylstearate	LC/MS neg	38296			3083779		1.19		0.3097	0.0444		0.8283	0.9816		100002356	2724-59-6	5993	297.28
	1131		Fatty Acid, Dicarboxylate	2-hydroxyglutarate	LC/MS polar	37253	C02630	HMDB00606	43		0.41		2.5593e-06	4.5064e-06		0.9711	0.394		100002070	40951-21-1	3352.8	147.03
	1134			2-hydroxyadipate	LC/MS polar	31934	C02360	HMDB00321	193530		0.1		0.0006	0.0002		0.8202	0.0791		100001153	18294-85-4	3000	161.046
	1143			azelate (nonanedioate)	LC/MS polar	18362	C08261	HMDB00784	2266		0.56		0.0033	0.0009		0.8595	0.4785		2029	123-99-9	2520	187.098
	1197		Fatty Acid Synthesis	malonylcarnitine	LC/MS pos	37059		HMDB02095	22833583		0.19		5.7165e-06	6.9341e-06		0.7443	0.1421		100001526	853728-01-5	965	248.113
	1199			2-methylmalonyl carnitine	LC/MS pos	35482		HMDB13133	53481628		0.09		5.3233e-05	3.8187e-05		0.9211	0.0795		100001596	149181-64-6	1552.7	262.129
	1200		Fatty Acid Metabolism	acetyl CoA	LC/MS neg	43840	C00024	HMDB01206	444493		2.22		0.0062	0.0015		1.1937	2.6459		1830	102029-73-2	1691	403.556
	1208			myristoyl CoA	LC/MS neg	36859	C02593	HMDB01521	65113		1					0.6067	0.6067		100000610		5306	487.65
	1211		Fatty Acid Metabolism (also BCAA Metabolism)	butyrylcarnitine	LC/MS pos	32412	C02862	HMDB02013	439829		1.96		0.002	0.0006		0.7265	1.4233		100001054	25576-40-3	1977	232.154
	1214			propionylcarnitine	LC/MS pos	32452	C03017	HMDB00824	107738		2.18		8.1606e-06	9.2802e-06		0.7272	1.5868		100001162	17298-37-2	1590	218.139
	1228		Fatty Acid Metabolism(Acyl Carnitine)	acetylcarnitine	LC/MS pos	32198	C02571	HMDB00201	1		0.9		0.5683	0.0735		0.8436	0.7626		100000802	5080-50-2	1166.9	204.123
	1229			hydroxybutyrylcarnitine*	LC/MS pos	43264		HMDB13127	53481617		1.06		0.4325	0.0583		0.8797	0.9349		100003926		1477	248.149
	1230			valerylcarnitine	LC/MS pos	34406		HMDB13128	6426903		2.37		4.2906e-05	3.1649e-05		1.0148	2.4001		100001394		2555	246.17
	1231			hexanoylcarnitine	LC/MS pos	32328		HMDB00705	6426853		1.68		0.0109	0.0025		0.7468	1.2568		100000781	6920-35-0	3194	260.186
	1232			octanoylcarnitine	LC/MS pos	33936	C02838	HMDB00791	123701		0.83		0.4255	0.0582		0.5837	0.4872		100001247	3671-77-0	4090	288.217
	1238			myristoylcarnitine	LC/MS pos	33952		HMDB05066	53477791		2.15		0.2852	0.0411		0.3192	0.6847		100001270	18822-89-4	5142.1	372.311
	1240			palmitoylcarnitine	LC/MS pos	44681	C02990	HMDB00222	461		2.71		0.0533	0.0098		0.3035	0.8238		100000776	6865-14-1	5204	400.342
	1241			stearoylcarnitine	LC/MS pos	34409		HMDB00848	6426855		2.88		0.1917	0.0294		0.464	1.3366		100001391	18822-91-8	5256	428.373
	1243			oleoylcarnitine	LC/MS pos	35160		HMDB05065	6441392;53477789		1.28		0.6172	0.0793		0.2906	0.372		100001501	38677-66-6	5215	426.358
	1245			myristoleoylcarnitine*	LC/MS pos	48182					1.04		0.635	0.0814		0.3474	0.3608		100006051	889848-55-9	5120	370.295
	1246		Carnitine Metabolism	deoxycarnitine	LC/MS pos	36747	C01181	HMDB01161	134		0.58		0.0038	0.001		0.922	0.5318		100001662	6249-56-5	742.4	146.118
	1247			carnitine	LC/MS pos	15500	C00318	HMDB00062	10917		0.52		3.1829e-05	2.5931e-05		0.9886	0.5183		100000007	461-05-2	688.9	162.112
	1252		Ketone Bodies	3-hydroxybutyrate (BHBA)	LC/MS polar	542	C01089	HMDB00357	441		1.84		0.0208	0.0044		0.6576	1.2081		254	625-72-9	1443.3	103.04
	1260		Fatty Acid, Monohydroxy	2-hydroxystearate	LC/MS neg	17945	C03045		69417		0.73		0.4574	0.0609		0.8471	0.6165		1239	629-22-1	5695	299.259
	1263			3-hydroxyoctanoate	LC/MS neg	22001		HMDB01954	26613		1.54		0.0233	0.0049		0.6447	0.9912		100000773	88930-08-9	3446	159.103
	1266			3-hydroxylaurate	LC/MS neg	32457		HMDB00387	94216		3.63		6.0119e-05	4.0493e-05		0.6753	2.4535		100001112	53941-38-1	5175	215.165
	1374		Endocannabinoid	oleic ethanolamide	LC/MS neg	38102		HMDB02088	5283454		0.87		0.3591	0.0503		0.7768	0.672		1137	11-58-0;111-58-0	6900	324.291
	1377			palmitoyl ethanolamide	LC/MS neg	38165	C16512	HMDB02100	4671		1.24		0.0808	0.014		0.8902	1.106		1489	544-31-0	6760	298.275
	1384			N-oleoyltaurine	LC/MS neg	39732			6437033		14.36		0.0002	9.9673e-05		0.3257	4.6781		100003119	52514-04-2	5610	388.253
	1385			N-stearoyltaurine	LC/MS neg	39730			168274		8.26		0.0003	0.0001		0.1389	1.1473		100003240	63155-80-6	5782	390.268
	1386			N-palmitoyltaurine	LC/MS neg	39835					1.18		0.1977	0.0301		0.9075	1.0678		100003239	83982-06-3	5560	362.237
	1389		Inositol Metabolism	myo-inositol	LC/MS polar	1124	C00137	HMDB00211	892		0.48		0.0023	0.0007		0.8433	0.4035		363	87-89-8	3506.3	225.062
	1392			scyllo-inositol	GC/MS	32379	C06153	HMDB06088	892		0.68		0.1614	0.0256		0.8131	0.5508		100001215	488-59-5	1893.8	318.2
	1397			inositol 1-phosphate (I1P)	GC/MS	1481	C04006	HMDB00213	440194		0.76		0.0418	0.008		1.0734	0.8164		370	573-35-3;106032-59-1	2057.8	318.1
	1416		Phospholipid Metabolism	choline	LC/MS pos	15506	C00114	HMDB00097	305		0.94		0.2531	0.0372		0.9904	0.9333		1256	67-48-1	675	104.107
	1417			choline phosphate	LC/MS pos	34396	C00588	HMDB01565	1014		2.41		0.0002	7.5114e-05		0.8601	2.0731		267	72556-74-2	692.5	184.073
	1418			cytidine 5'-diphosphocholine	LC/MS polar	34418	C00307	HMDB01413	13804		0.65		0.0723	0.0127		0.8658	0.5644		1220	33818-15-4	4200	533.106
	1419			glycerophosphorylcholine (GPC)	LC/MS pos	15990	C00670	HMDB00086	71920		0.17		9.494e-06	1.0475e-05		1.2415	0.2075		100000269	28319-77-9	709.9	258.11
	1422			ethanolamine	GC/MS	1497	C00189	HMDB00149	700		1.07		0.5146	0.0674		0.9955	1.0672		420	141-43-5	1304	174.1
	1423			phosphoethanolamine	LC/MS pos	1600	C00346	HMDB00224	1015		5.6		9.5579e-05	5.2699e-05		0.3839	2.1517		1026	1071-23-4	682.7	142.026
	1424			cytidine-5'-diphosphoethanolamine	LC/MS polar	34410	C00570	HMDB01564	123727		0.61		0.0467	0.0088		0.7908	0.4821		100001407	72842-05-8	4210	445.053
	1425			glycerophosphoethanolamine	LC/MS polar	37455	C01233	HMDB00114	123874		0.07		7.4806e-08	4.0833e-07		1.2552	0.0858		100001620	33049-08-0	3075	214.049
	1427			glycerophosphoinositol*	LC/MS polar	47155					0.81		0.0333	0.0066		1.149	0.9355		100001621	16824-65-0	3850	333.059
	1428			1-palmitoyl-2-oleoyl-GPC (16:0/18:1)*	LC/MS polar	52461			6436017		0.97		0.5004	0.0658		0.9866	0.9529		1539	26853-31-6;26853-31-6	853	804.576
	1429			1-stearoyl-2-arachidonoyl-GPC (18:0/20:4)	LC/MS polar	42450			16219824		1.28		0.0643	0.0114		0.878	1.1238		100001869	35418-59-8	850	854.591
	1431			1,2-dipalmitoyl-GPC (16:0/16:0)	LC/MS polar	19130		HMDB00564	452110		0.68		0.0022	0.0006		0.9625	0.6543		100000657	63-89-8	830	778.56
	1432			1-stearoyl-2-oleoyl-GPC (18:0/18:1)	LC/MS polar	52438					0.87		0.2854	0.0411		1.1278	0.9777		100008904	56421-10-4	830	832.607
	1433			1,2-dioleoyl-GPC (18:1/18:1)*	LC/MS polar	52457			10350317		1.01		0.7473	0.0932		0.9995	1.0143		100008905	4235-95-4	853	830.592
	1434			1-palmitoyl-2-arachidonoyl-GPC (16:0/20:4)*	LC/MS polar	52459			10747814		0.79		0.1023	0.0171		0.8568	0.6767		100008914	35418-58-7	870	826.56
	1437			1-palmitoleoyl-2-oleoyl-GPC (16:1/18:1)*	LC/MS polar	52458					0.37		9.9914e-06	1.0614e-05		0.8754	0.3251		100008983		866	802.56
	1438			1-palmitoyl-2-palmitoleoyl-GPC (16:0/16:1)*	LC/MS polar	52470					0.47		2.9417e-07	9.1451e-07		0.9183	0.4278		100008984		872	776.545
	1440			1,2-dipalmitoleoyl-GPC (16:1/16:1)*	LC/MS polar	52472					0.16		3.7016e-07	1.0102e-06		0.8476	0.1391		100008997		850	774.529
	1442			1-stearoyl-2-arachidonoyl-GPI (18:0/20:4)*	LC/MS polar	52449					1.12		0.4548	0.0608		0.8076	0.9083		100000616		870	885.549
	1443			1-palmitoyl-2-linoleoyl-GPI (16:0/18:2)*	LC/MS polar	52450					0.27		0.0003	0.0001		0.9999	0.2718		1528		910	833.518
	1444			1-oleoyl-2-linoleoyl-GPI (18:1/18:2)*	LC/MS polar	52451					0.97		0.9113	0.1113		0.883	0.8529		100008979		902	859.534
	1447			1-stearoyl-2-arachidonoyl-GPS (18:0/20:4)	LC/MS polar	48502					1.03		0.6529	0.0831		0.9672	1.0002		100001872		888	810.529
	1448			1-stearoyl-2-oleoyl-GPS (18:0/18:1)*	LC/MS polar	48494			9547087		0.33		0.3185	0.0453		0.532	0.1757		100000639		901	788.545
	1449			1-palmitoyl-2-oleoyl-GPG (16:0/18:1)*	LC/MS polar	52448			5283509		2.07		0.0004	0.0001		1.0762	2.2255		100000641		745	747.519
	1450			1-(1-enyl-palmitoyl)-2-oleoyl-GPE (P-16:0/18:1)*	LC/MS polar	52477					0.35		0.0213	0.0045		1.2793	0.443		100009005		768	700.529
	1451			1-(1-enyl-stearoyl)-2-arachidonoyl-GPE (P-18:0/20:4)*	LC/MS polar	52475					0.69		0.0021	0.0006		1.0914	0.753		100008999		753	750.544
	1452			1-(1-enyl-stearoyl)-2-docosahexaenoyl-GPE (P-18:0/22:6)*	LC/MS polar	52476					0.85		0.4231	0.058		1.0037	0.858		100009004		751	774.544
	1453			1-palmitoleoyl-2-oleoyl-GPE (16:1/18:1)*	LC/MS polar	52469					0.37		1.2525e-07	6.2152e-07		0.9273	0.3472		100008995		767	714.508
	1454			1-palmitoyl-2-oleoyl-GPE (16:0/18:1)	LC/MS polar	19263		HMDB05320	5283496		0.85		0.1368	0.0222		0.9716	0.8281		1526	26662-94-2	765	716.524
	1455			1-palmitoyl-2-palmitoleoyl-GPE (16:0/16:1)*	LC/MS polar	52471					0.71		0.0276	0.0056		0.9232	0.6509		100008996		767	688.492
	1456			1-stearoyl-2-arachidonoyl-GPE (18:0/20:4)*	LC/MS polar	52447					1.31		0.0031	0.0008		0.9103	1.1939		100008977		756	766.539
	1457			1-stearoyl-2-docosahexaenoyl-GPE (18:0/22:6)*	LC/MS polar	52466					3.32		6.1588e-05	4.0493e-05		0.7524	2.4964		100008992		752	790.539
	1458			1-stearoyl-2-oleoyl-GPE (18:0/18:1)	LC/MS polar	42448					0.7		0.0021	0.0006		0.9611	0.6738		100001856		750	744.555
	1469		Lysolipid	1-palmitoyl-GPC (16:0)	LC/MS neg	33955		HMDB10382	86554		1.08		0.9898	0.1198		1.3082	1.408		100001263	17364-16-8	6380	570.341
	1470			2-palmitoylglycerophosphocholine*	LC/MS neg	35253		HMDB61702	15061532		1.34		0.748	0.0932		0.8707	1.1638		100001562		6215	570.341
	1471			1-palmitoleoyl-GPC (16:1)*	LC/MS neg	47117		HMDB10383	24779461		0.55		0.0369	0.0072		1.1238	0.6143		100001511		5794	568.326
	1472			2-palmitoleoylglycerophosphocholine*	LC/MS pos	35819					1.34		0.6381	0.0816		0.8143	1.088		100001561		5490	494.324
	1475			1-stearoyl-GPC (18:0)	LC/MS neg	33961		HMDB10384	497299		0.63		0.1112	0.0184		1.3519	0.8455		100001271	19420-57-6	6870	598.373
	1477			1-oleoyl-GPC (18:1)	LC/MS neg	48258		HMDB02815	16081932		1.23		0.4289	0.0582		1.2386	1.5257		100001272	19420-56-5	6250	596.357
	1503			1-palmitoylplasmenylethanolamine*	LC/MS neg	39270					0.25		0.0058	0.0014		1.9137	0.4774		100003000		6285	436.283
	1504			1-stearoylplasmenylethanolamine*	LC/MS neg	39271					0.21		0.001	0.0003		1.7989	0.3777		100003001		6500	464.315
	1505			1-oleoylplasmenylethanolamine*	LC/MS neg	44621					0.19		0.0553	0.0101		2.2505	0.4216		100005372		6250	462.299
	1508			1-palmitoylglycerophosphoethanolamine	LC/MS neg	35631		HMDB11503	9547069		1.18		0.4948	0.0652		1.1059	1.3061		100001567		6057.2	452.278
	1511			1-stearoylglycerophosphoethanolamine	LC/MS neg	42398		HMDB11130	9547068		0.38		0.0069	0.0017		1.6302	0.6204		100001461	69747-55-3	6514	480.31
	1512			2-stearoylglycerophosphoethanolamine*	LC/MS neg	41220					0.23		0.049	0.0091		2.0635	0.4816		100003901		6350	480.31
	1513			1-oleoylglycerophosphoethanolamine	LC/MS neg	35628		HMDB11506	9547071		0.51		0.0455	0.0086		1.4395	0.7333		100001569	89576-29-4	6125.1	478.294
	1521			1-arachidonoylglycerophosphoethanolamine*	LC/MS neg	35186		HMDB11517	42607465		0.63		0.1244	0.0204		1.0704	0.6764		100001571		5874	500.278
	1531			1-palmitoylglycerophosphoinositol*	LC/MS neg	35305		HMDB61695			0.57		0.2553	0.0374		2.4996	1.4306		100001655		5564	571.289
	1534			1-stearoylglycerophosphoinositol	LC/MS neg	19324		HMDB61696			0.54		0.104	0.0174		2.1972	1.1878		100000656	796963-93-4	5794.3	599.32
	1536			1-oleoylglycerophosphoinositol*	LC/MS neg	36602					0.35		0.0132	0.003		1.7116	0.5949		100001777		5599	597.305
	1542			1-arachidonoylglycerophosphoinositol*	LC/MS neg	34214		HMDB61690			1.08		0.7522	0.0935		1.6182	1.7506		100001654		5482	619.289
	1544			1-stearoylglycerophosphoserine*	LC/MS neg	45966			9547101		1.09		0.6038	0.0777		1.3244	1.4445		100004327		5800	524.299
	1555			1-palmitoylglycerophosphoglycerol*	LC/MS neg	45970			3300276		2.84		0.0034	0.0009		0.9016	2.5575		100005717		5570	483.273
	1558			1-stearoylglycerophosphoglycerol	LC/MS neg	34437					2.56		0.0083	0.002		1.2051	3.0826		100001462		5816	511.304
	1560			1-oleoylglycerophosphoglycerol*	LC/MS neg	45968					2.01		0.002	0.0006		0.7767	1.5641		100005716		5610	509.288
	1593		Glycerolipid Metabolism	glycerol	LC/MS neg	15122	C00116	HMDB00131	753		1.06		0.4912	0.0649		0.8794	0.9311		1254	56-81-5	758	91.0401
	1594			glycerol 3-phosphate (G3P)	LC/MS polar	43847	C00093	HMDB00126	754		0.11		1.0412e-05	1.0723e-05		1.3639	0.1434		100000258	29849-82-9	3938.7	171.006
	1599			glycerophosphoglycerol	LC/MS polar	48857	C03274		439964		1.18		0.1436	0.0233		1.5316	1.8034		100001619		2430	245.043
	1600		Monoacylglycerol	1-myristoylglycerol (14:0)	LC/MS neg	35625	C01885	HMDB11561	79050		3.12		3.1903e-06	5.2771e-06		0.7639	2.3863		100001618	75685-84-6	6353.3	227.202
	1601			2-myristoylglycerol (14:0)	LC/MS neg	34383			137938		4.18		6.6811e-05	4.2405e-05		0.8685	3.6312		100001408	27214-38-6	6230	227.202
	1604			1-palmitoylglycerol (1-monopalmitin)	LC/MS neg	21127		HMDB31074	14900		2.85		0.0006	0.0002		0.7171	2.041		100000827	542-44-9	6400	255.233
	1605			2-palmitoylglycerol (16:0)	LC/MS neg	33419		HMDB11533	123409		4.84		0.0001	6.4478e-05		0.6896	3.3363		100001048	23470-00-0	6628.9	255.233
	1606			1-margaroylglycerol (17:0)	LC/MS neg	34391			107036		3.03		0.0005	0.0002		0.6102	1.8512		100001429	68002-72-2	6571	269.249
	1607			1-stearoylglycerol (18:0)	GC/MS	21188	D01947	HMDB31075	24699		1.02		0.9046	0.1107		1.0361	1.0552		100000932	123-94-4;31566-31-1	2186.6	399.4
	1609			1-oleoylglycerol (18:1)	LC/MS neg	21184		HMDB11567	5283468		3.65		4.4196e-06	6.1857e-06		0.7497	2.7358		100000924	111-03-5	6794	281.249
	1610			2-oleoylglycerol (18:1)	LC/MS neg	21232			5319879		4.95		2.8165e-06	4.8043e-06		0.8663	4.2924		100000943	3443-84-3	6950	281.249
	1612			2-linoleoylglycerol (18:2)	LC/MS neg	32506		HMDB11538	5365676		4.09		0.0015	0.0005		0.5627	2.3002		100000987	3443-82-1	6250	279.233
	1619			1-docosahexaenoylglycerol (22:6)	LC/MS neg	35153		HMDB11587			2.32		0.0175	0.0038		0.6387	1.4833		100001481		6150	309.222
	1623			2-docosahexaenoylglcyerol*	LC/MS neg	48675		HMDB11557			4.65		0.0011	0.0004		0.3928	1.8248		100006352		6000	309.222
	1624			1-palmitoleoylglycerol (16:1)*	LC/MS neg	52431					1.07		0.427	0.0582		1.0008	1.0711		100008952		6094	253.217
	1625			2-palmitoleoylglycerol (16:1)*	LC/MS neg	52432					1.69		0.0498	0.0092		0.8673	1.4615		100008953		6016	253.217
	1633		Sphingolipid Metabolism	sphinganine	LC/MS pos	17769	C00836	HMDB00269	3126		0.04		6.9706e-05	4.345e-05		1.0337	0.0441		313	3102-56-5	5178.3	302.305
	1636			palmitoyl sphingomyelin (d18:1/16:0)	LC/MS polar	37506			9939941		0.52		7.5975e-05	4.4592e-05		0.985	0.5075		100002107	6254-89-3	870	747.566
	1642			sphingosine	LC/MS neg	17747	C00319	HMDB00252	5353955		1.13		0.4281	0.0582		0.9519	1.0758		297	123-78-4	6280.5	298.275
	1650			N-palmitoyl-sphingosine	LC/MS polar	48278		HMDB04949	5283564		6.64		0.0001	6.4478e-05		0.4961	3.2932		1518	24696-26-2	703	582.51
	1652			sphingomyelin (d18:1/14:0, d16:1/16:0)*	LC/MS polar	42463			11433862		0.47		0.0003	0.0001		1.0824	0.5136		100004328		873	719.534
	1655			sphingomyelin (d18:2/16:0, d18:1/16:1)*	LC/MS polar	42459					0.44		2.5596e-05	2.2177e-05		1.0334	0.45		100004329		866	745.55
	1662		Mevalonate Metabolism	3-hydroxy-3-methylglutarate	LC/MS polar	531	C03761	HMDB00355	1662		7.44		6.2539e-10	1.7068e-08		1.0214	7.5968		112	503-49-1	2700	161.046
	1672		Sterol	lathosterol	GC/MS	39864	C01189	HMDB01170	65728		0.39		0.0016	0.0005		1.2792	0.5028		100001105	80-99-9;80-99-9	2337	255.2
	1674			cholesterol	GC/MS	63	C00187	HMDB00067	11025495		0.87		0.0442	0.0084		1.0493	0.9128		266	57-88-5	2316.9	329.3
	1687			cholestanol	GC/MS	21131	C12978	HMDB00908	6665		0.99		0.9431	0.1149		1.1159	1.1077		100000859	80-97-7	2320.8	215.2
	1843		Primary Bile Acid Metabolism	glycochenodeoxycholate	LC/MS neg	32346	C05466	HMDB00637	12544		1.35		0.1351	0.022		1.1754	1.5906		1628	16564-43-5	5236.1	448.307
	1844			taurochenodeoxycholate	LC/MS neg	18494	C05465	HMDB00951	387316		1.76		0.0597	0.0108		1.5841	2.7878		1629	6009-98-9	5250	498.289
	1850		Secondary Bile Acid Metabolism	deoxycholate	LC/MS neg	1114	C04483	HMDB00626	222528		0.78		0.1129	0.0186		0.938	0.736		302	83-44-3	5294	391.285
	2427	Nucleotide	Purine Metabolism, (Hypo)Xanthine/Inosine containing	inosine 5'-monophosphate (IMP)	LC/MS polar	2133	C00130	HMDB00175	8582		2.96		0.0008	0.0003		0.5176	1.5302		362	4691-65-0	4267.7	347.04
	2428			inosine	LC/MS pos	1123	C00294	HMDB00195	6021		0.51		0.0001	6.2558e-05		1.2536	0.6361		361	58-63-9	1679.3	269.088
	2429			hypoxanthine	LC/MS neg	3127	C00262	HMDB00157	790		0.47		1.7792e-05	1.646e-05		1.4679	0.6865		171	68-94-0	1291.2	135.031
	2430			xanthine	LC/MS neg	3147	C00385	HMDB00292	1188		0.08		1.4429e-08	1.3126e-07		1.4295	0.1143		1004	69-89-6	908.9	151.026
	2431			xanthosine 5'-monophosphate (xmp)	LC/MS neg	12024	C00655	HMDB01554	73323		0.36		0.0005	0.0002		1.2108	0.4404		1251	25899-70-1	580	363.035
	2432			xanthosine	LC/MS pos	15136	C01762	HMDB00299	64959		0.12		0.0001	6.4478e-05		0.9179	0.1135		100000299	146-80-5	1827	285.083
	2435			2'-deoxyinosine	LC/MS neg	15076	C05512	HMDB00071	65058		0.57		0.7812	0.0969		2.3839	1.3679		100000135	890-38-0	1688	251.079
	2437			urate	LC/MS neg	1604	C00366	HMDB00289	1175		0.47		0.0003	0.0001		1.1302	0.5285		1134	69-93-2;120K5305	757.1	167.021
	2438			allantoin	LC/MS polar	1107	C02350	HMDB00462	204		0.93		0.2877	0.0413		1.0003	0.9256		1002	97-59-6	1672	157.037
	2442		Purine Metabolism, Adenine containing	adenosine 5'-diphosphate (ADP)	LC/MS neg	3108	C00008	HMDB01341	6022		0.57		0.2106	0.0317		0.609	0.3489		208	20398-34-9	680	426.022
	2443			adenosine 5'-monophosphate (AMP)	LC/MS pos	32342	C00020	HMDB00045	6083		1.73		3.9216e-05	3.015e-05		0.805	1.3907		209	149022-20-8	1208	348.07
	2444			adenosine 3'-monophosphate (3'-AMP)	LC/MS neg	35142	C01367	HMDB03540	41211		0.67		0.0833	0.0143		1.3785	0.928		100001449	84-21-9	1245	346.056
	2445			adenosine 2'-monophosphate (2'-AMP)	LC/MS neg	36815	C00946	HMDB11617	94136		0.26		0.0271	0.0055		1.5255	0.4012		100001694	130-49-4	1497.7	346.056
	2446			adenosine 3',5'-cyclic monophosphate (cAMP)	LC/MS neg	2831	C00575	HMDB00058	6076		0.81		0.0288	0.0058		1.2857	1.0371		207	60-92-4	1952.2	328.045
	2449			adenylosuccinate	LC/MS neg	18360	C03794	HMDB00536	195		4.32		2.9355e-08	2.289e-07		0.736	3.1767		1303	19046-78-7	560	230.53
	2450			adenosine	LC/MS pos	555	C00212	HMDB00050	60961		0.47		4.9729e-06	6.6206e-06		1.2314	0.5728		798	58-61-7	1625.3	268.104
	2451			adenine	LC/MS pos	554	C00147	HMDB00034	190		1.41		0.004	0.0011		0.9516	1.3412		880	73-24-5	1002	136.062
	2456			N1-methyladenosine	LC/MS pos	15650	C02494	HMDB03331	27476		2.24		3.6742e-05	2.9131e-05		0.9558	2.1363		1242	15763-06-1	1399	282.12
	2458			N6,N6-dimethyladenosine	LC/MS pos	42081			348206		0.34		0.0025	0.0007		1.6461	0.5614		100003867	2620-62-4	2537	296.135
	2466			N6-carbamoylthreonyladenosine	LC/MS neg	35157		HMDB41623	161466		1.24		0.0165	0.0036		1.0243	1.2676		100001415	24719-82-2	2164	411.127
	2468			2'-deoxyadenosine 5'-diphosphate	LC/MS neg	15116	C00206	HMDB01508	188966		1.45		0.1552	0.0248		0.8761	1.2734		1228	72003-83-9	1050	410.027
	2469			2'-deoxyadenosine 5'-monophosphate	LC/MS neg	46333	C00360	HMDB00905	12599		1.41		0.0016	0.0005		1.0452	1.4718		100000485	653-63-4	1315	330.061
	2474			diadenosine triphosphate	LC/MS neg	47397	C06197	HMDB01155			0.81		0.2422	0.036		0.6789	0.5482		100002712	56432-02-1	1213.7	755.075
	2475			N6-succinyladenosine	LC/MS pos	48130		HMDB00912			0.87		0.839	0.1034		1.2485	1.0889		100001664	4542-23-8	2222	384.115
	2476		Purine Metabolism, Guanine containing	guanosine 5'-triphosphate	LC/MS neg	2847	C00044	HMDB01273	6830		0.23		0.028	0.0056		0.3576	0.0815		345	373-49-9	592	521.983
	2477			guanosine 5'- diphosphate (GDP)	LC/MS neg	2848	C00035	HMDB01201	8977		0.37		0.0002	9.2438e-05		0.946	0.3529		346	43139-22-6	639	442.017
	2478			guanosine 5'- monophosphate (5'-GMP)	LC/MS pos	2849	C00144	HMDB01397	6804		1.09		0.1443	0.0233		0.8936	0.9757		347	5550-12-09	1300	364.065
	2479			guanosine 3'-monophosphate (3'-GMP)	LC/MS neg	39786			3522		0.58		0.028	0.0056		1.4136	0.8229		100002704	117-68-0	773.9	362.051
	2483			guanosine	LC/MS pos	1573	C00387	HMDB00133	6802		0.49		0.0012	0.0004		1.586	0.781		1099	118-00-3	1680	284.099
	2484			guanine	LC/MS pos	32352	C00242	HMDB00132	764		1.07		0.1686	0.0264		0.935	1.0025		172	73-40-5	1035	152.057
	2486			7-methylguanine	LC/MS neg	35114	C02242	HMDB00897	11361		1.14		0.1748	0.0273		1.0608	1.2094		100001456	578-76-7	1729.7	164.058
	2490			N1-methylguanosine	LC/MS pos	31609		HMDB01563	96373		0.98		0.6607	0.0837		1.3684	1.3439		100001122	2140-65-0	1869	298.115
	2492			N2,N2-dimethylguanosine	LC/MS pos	35137		HMDB04824	92919		1.76		0.0237	0.005		0.7918	1.397		100001412	2140-67-2	2168	312.13
	2500			2'-deoxyguanosine	LC/MS neg	1411	C00330	HMDB00085	187790		0.42		0.1314	0.0215		2.2495	0.9391		348	961-07-9	1751	266.089
	2501			guanosine 2'-monophosphate (2'-GMP)*	LC/MS neg	52442			444571		0.27		0.0036	0.001		1.4643	0.3885		100002733		1241	362.051
	2502		Pyrimidine Metabolism, Orotate containing	N-carbamoylaspartate	LC/MS polar	1594	C00438	HMDB00828	93072		0.55		0.3132	0.0446		0.8475	0.4693		1108	923-37-5	3800	175.036
	2503			dihydroorotate	LC/MS polar	601	C00337	HMDB03349	648		0.49		0.3632	0.0507		0.9012	0.4403		923	155-54-4	1910.1	157.025
	2504			orotate	LC/MS polar	1505	C00295	HMDB00226	967		3.44		0.0261	0.0054		0.9327	3.2044		445	50887-69-9	1638.1	155.01
	2506			orotidine	LC/MS polar	35172	C01103	HMDB00788	92751		0.68		0.3348	0.0472		0.6279	0.4253		100001416	314-50-1	2250	287.052
	2509		Pyrimidine Metabolism, Uracil containing	uridine 5'-triphosphate (UTP)	LC/MS neg	33448	C00075	HMDB00285	6133		0.04		3.6824e-05	2.9131e-05		0.8363	0.0301		871	19817-92-6	572	482.961
	2510			uridine 5'-diphosphate (UDP)	LC/MS neg	5345	C00015	HMDB00295	6031		0.25		0.0004	0.0001		0.9447	0.2386		870	21931-53-3	599.5	402.995
	2511			uridine 5'-monophosphate (UMP)	LC/MS polar	2856	C00105	HMDB00288	6030		0.87		0.2772	0.0401		0.9458	0.8244		869	3387-36-8	4150	323.029
	2513			uridine 3'-monophosphate (3'-UMP)	LC/MS polar	39764	C01368		101543		0.43		0.0025	0.0007		1.2374	0.53		106	35170-0-7;35170-03-7	3800	323.029
	2515			uridine-2',3'-cyclic monophosphate	LC/MS neg	37137	C02355	HMDB11640	439715		2.07		0.4047	0.0559		0.2079	0.4306		75	40632-52-8	1090	305.018
	2516			uridine	LC/MS neg	606	C00299	HMDB00296	6029		0.31		7.8412e-05	4.5533e-05		1.1755	0.3701		535	58-96-8	1457.6	243.062
	2517			uracil	LC/MS neg	605	C00106	HMDB00300	1174		1.25		0.0964	0.0163		1.2398	1.552		825	66-22-8	1086	111.02
	2518			pseudouridine	LC/MS neg	33442	C02067	HMDB00767	15047		1.06		0.3943	0.0546		0.9519	1.0127		821	1445-07-4	1100	243.062
	2519			5-methyluridine (ribothymidine)	LC/MS neg	35136		HMDB00884	445408		7.83		7.4631e-05	4.4592e-05		0.7822	6.1235		100001446	1463-10-1	1778.1	257.078
	2533			beta-alanine	GC/MS	55	C00099	HMDB00056	239		1.31		0.0204	0.0044		0.96	1.2592		244	56-41-7;107-95-9	1451.8	174
	2536		Pyrimidine Metabolism, Cytidine containing	cytidine triphosphate	LC/MS neg	2844	C00063	HMDB00082	6176		0.04		7.4035e-05	4.4592e-05		0.8346	0.0334		281	36051-68-0	575	481.977
	2537			cytidine diphosphate	LC/MS neg	2841	C00112	HMDB01546	6132		0.31		0.0004	0.0001		1.0221	0.3124		280	34393-59-4	580	402.011
	2538			cytidine 5'-monophosphate (5'-CMP)	LC/MS pos	2372	C00055	HMDB00095	6131		0.71		8.5597e-05	4.8168e-05		0.943	0.6652		282	63-37-6	890	324.059
	2539			cytidine 3'-monophosphate (3'-CMP)	LC/MS pos	2959	C05822		66535		1.24		0.3674	0.0512		1.5211	1.884		105	84-52-6	1203	324.059
	2540			cytidine 2',3'-cyclic monophosphate	LC/MS neg	37465	C02354	HMDB11691	417654		2.03		0.4449	0.0597		0.2937	0.5948		73	15718-51-1	937	304.034
	2541			cytidine	LC/MS pos	514	C00475	HMDB00089	6175		0.88		0.9972	0.1204		1.653	1.4571		827	65-46-3	1075.9	244.093
	2549			2'-deoxycytidine 5'-monophosphate	LC/MS pos	533	C00239	HMDB01202	13945		7.4		6.2999e-06	7.4756e-06		0.3864	2.8601		298	1032-65-1	1125.5	308.064
	2553		Pyrimidine Metabolism, Thymine containing	thymidine 5'-monophosphate	LC/MS neg	12023	C00364	HMDB01227	9700		1.63		0.0016	0.0005		0.8836	1.436		1248	33430-62-5	883	321.049
	2557			thymidine	LC/MS neg	2183	C00214	HMDB00273	5789		1.03		0.4323	0.0583		1.9577	2.0183		872	50-89-5	1963.7	241.083
	2558			thymine	LC/MS neg	604	C00178	HMDB00262	1135		15.4		3.697e-06	5.9353e-06		1.037	15.9748		882	65-71-4	1654	125.036
	2562		Purine and Pyrimidine Metabolism	methylphosphate	LC/MS polar	37070		HMDB61711	13130		0.77		0.0196	0.0042		0.8911	0.6886		100001805	7023-27-0	3760.1	110.985
	2564	Cofactors and Vitamins	Nicotinate and Nicotinamide Metabolism	nicotinate	LC/MS neg	1504	C00253	HMDB01488	938		0.75		0.2256	0.0337		0.973	0.7298		567	59-67-6	1180	122.025
	2567			nicotinamide	LC/MS pos	594	C00153	HMDB01406	936		0.46		1.2616e-06	2.6485e-06		1.0395	0.4806		432	98-92-0	1271.1	123.055
	2569			nicotinamide ribonucleotide (NMN)	LC/MS pos	22152	C00455	HMDB00229	14180		0.15		0.0007	0.0002		2.42	0.352		1312	1094-61-7	893.2	335.064
	2571			nicotinamide adenine dinucleotide (NAD+)	LC/MS neg	5278	C00003	HMDB00902	5893		0.06		6.9047e-08	4.0833e-07		1.2079	0.0677		1310	53-84-9	1434	662.102
	2572			nicotinamide adenine dinucleotide reduced (NADH)	LC/MS neg	31475	C00004	HMDB01487	439153		0.08		1.8991e-07	7.9741e-07		1.2614	0.0992		428	58-68-4;606-68-8	1540	664.117
	2575			nicotinamide adenine dinucleotide phosphate reduced (NADPH)	LC/MS neg	33450	C00005	HMDB00221	5884		0.17		0.0115	0.0026		0.6907	0.1176		430	2646-71-1	900	744.084
	2579			1-methylnicotinamide	LC/MS pos	27665	C02918	HMDB00699	10129985		0.36		0.0021	0.0006		1.3429	0.4849		55	1005-24-9	691.3	137.071
	2584			trigonelline (N'-methylnicotinate)	LC/MS pos	32401	C01004	HMDB00875	5570		0.49		0.0375	0.0073		0.821	0.405		100001092	535-83-1	771.8	138.055
	2587			adenosine 5'-diphosphoribose (ADP-ribose)	LC/MS polar	558	C00301	HMDB01178	192		0.14		0.0006	0.0002		2.0151	0.2725		215	68414-18-6	3640	558.064
	2589		Riboflavin Metabolism	riboflavin (Vitamin B2)	LC/MS pos	1827	C00255	HMDB00244	493570		1.2		0.199	0.0302		0.9332	1.1237		500	83-88-5	3098.3	377.146
	2590			flavin adenine dinucleotide (FAD)	LC/MS neg	2134	C00016	HMDB01248	643975		0.58		4.1747e-07	1.0699e-06		1.0189	0.5923		327	146-14-5;84366-81-4	2425	784.15
	2591			flavin mononucleotide (FMN)	LC/MS neg	15797	C00061	HMDB01520	710		1.57		0.0624	0.0112		0.9879	1.5492		100000251	130-40-5	2390	455.097
	2592		Pantothenate and CoA Metabolism	pantothenate	LC/MS pos	1508	C00864	HMDB00210	6613		0.28		3.7845e-05	2.9511e-05		1.3177	0.3656		1024	137-08-6	2212.4	220.118
	2594			phosphopantetheine	LC/MS neg	15504	C01134	HMDB01416	987		3.18		0.0054	0.0014		0.4979	1.5837		100000328	NA	1596.9	357.089
	2595			3'-dephosphocoenzyme A	LC/MS neg	18289	C00882	HMDB01373	444485		1.83		0.108	0.0179		1.6365	2.9988		100000138	3633-59-8	2013	686.142
	2596			coenzyme A	LC/MS neg	46322	C00010	HMDB01423	317		0.92		0.5937	0.0766		1.0943	1.0021		270	85-61-0;18439-24-2	1448	382.55
	2602		Ascorbate and Aldarate Metabolism	threonate	LC/MS polar	27738	C01620	HMDB00943	151152		0.51		0.0101	0.0024		0.9832	0.5022		100001022	70753-61-6	2384	135.03
	2605			gulonic acid*	LC/MS polar	46957			9794176		5.42		2.6506e-07	9.0425e-07		0.9396	5.0956		100001586	20246-53-1	2750	195.051
	2625		Folate Metabolism	5-methyltetrahydrofolate (5MeTHF)	LC/MS neg	18330	C00440	HMDB01396	146		0.11		1.0759e-06	2.349e-06		1.0797	0.1185		1244	68703-91-3;68792-52-9	1820	458.179
	2626		Tetrahydrobiopterin Metabolism	biopterin	LC/MS pos	12358	C06313	HMDB00468	445040		0.63		0.0265	0.0055		0.8488	0.5358		1548	22150-76-1	1562.7	238.093
	2627			dihydrobiopterin	LC/MS neg	35129	C00268	HMDB00038	1879		0.55		0.022	0.0047		0.8665	0.4742		100001506	6779-87-9	1552.3	194.068
	2630		Pterin Metabolism	pterin	LC/MS pos	43023	C00715	HMDB00802	73000		2.2		0.0011	0.0003		0.8873	1.9543		100004216	22363-60-4	1545	164.057
	2652		Thiamine Metabolism	thiamin (Vitamin B1)	LC/MS neg	5341	C00378	HMDB00235	1130		1.08		0.4311	0.0583		0.8658	0.9359		873	59-43-8	1726	263.097
	2654			thiamin diphosphate	LC/MS neg	35670	C00068	HMDB01372	1132		1.03		0.5304	0.0691		1.0092	1.038		522	154-87-0	1195.1	423.03
	2662		Vitamin B6 Metabolism	pyridoxine (Vitamin B6)	LC/MS neg	608	C00314	HMDB02075	1054		2.07		0.0018	0.0005		0.7771	1.6062		936	58-56-0	1657	168.067
	2665			pyridoxal phosphate	LC/MS neg	5331	C00018	HMDB01491	1051		0.23		7.1124e-06	8.2602e-06		0.8971	0.2037		492	41468-25-1	943	246.017
	2666			pyridoxal	LC/MS pos	1651	C00250	HMDB01545	1050		0.36		0.0023	0.0007		1.0874	0.3925		491	65-22-5	1203	168.066
	2667			pyridoxate	LC/MS polar	31555	C00847	HMDB00017	6723		1.83		0.0063	0.0016		0.9078	1.6581		100001121	82-82-6	846	182.046
	2669	Xenobiotics	Benzoate Metabolism	hippurate	LC/MS neg	15753	C01586	HMDB00714	464		1.37		0.0431	0.0082		1.0167	1.3975		100000014	495-69-2	2106.9	178.051
	2681			benzoate	LC/MS neg	15778	C00180	HMDB01870	243		1.05		0.4778	0.0633		0.888	0.9349		100000008	65-85-0	1750	121.029
	2700			O-methylcatechol sulfate	LC/MS neg	46111			22473		3.33		0.0015	0.0005		0.8037	2.674		100004208		2344	203.002
	2713			4-ethylphenylsulfate	LC/MS neg	36099	C13637				1.85		0.0697	0.0124		0.768	1.4224		100001756	123-07-9	3580	201.023
	2758		Food Component/Plant	2-piperidinone	LC/MS pos	43400			12665		0.24		0.0002	7.6683e-05		0.8504	0.2051		100004295	675-20-7	2047	100.076
	2872			gluconate	LC/MS polar	587	C00257	HMDB00625	10690		1.78		0.0025	0.0007		0.9987	1.7798		338	527-07-1	2922	195.051
	2940			erythritol	GC/MS	20699	C00503	HMDB02994	222285		1.3		0.0039	0.001		0.954	1.244		100000846	149-32-6	1517.5	217
	2962			homostachydrine*	LC/MS pos	33009	C08283	HMDB33433	441447		0.77		0.101	0.017		1.2744	0.9842		100001550	1195-94-4	1211	158.118
	3046			stachydrine	LC/MS pos	34384	C10172	HMDB04827	115244		0.92		0.6747	0.0849		1.2763	1.1679		100001296	4136-37-2	838.7	144.102
	3068			methyl glucopyranoside (alpha + beta)	LC/MS pos	46144					0.37		0.0179	0.0039		0.9898	0.3681		100005864		1090	212.113
	3146		Drug	streptomycin	LC/MS pos	39872			5999		5.07		0.0005	0.0002		0.3424	1.7365		100002993	3810-74-0	518.3	300.645
	3185			6-oxopiperidine-2-carboxylic acid	LC/MS pos	43231			3014237		1.01		0.8332	0.1029		0.6442	0.6491		100004499	34622-39-4	1826.6	144.066
	3310			penicillin G	LC/MS pos	37468	C05551	HMDB15186	5904		0.36		0.1662	0.0262		1.0987	0.3904		100002155	69-57-8	3370	335.106
	3421		Chemical	sulfate*	LC/MS neg	46960	C00059	HMDB01448	1118		1.24		0.0781	0.0136		0.9532	1.181		100002528	14808-79-8	616	96.9601
	3424			O-sulfo-L-tyrosine	LC/MS neg	45413			514186		0.8		0.0399	0.0077		0.9806	0.7889		100005384		990	260.023
	3440			2-aminophenol sulfate	LC/MS neg	43266		HMDB61116	181670		6.43		5.62e-13	3.0687e-11		0.5678	3.6526		100004322		1677	188.002
	3510			phenol red	LC/MS neg	36817	C12600		4766		1.17		0.1475	0.0237		0.9326	1.094		100001724	143-74-8	3665.9	353.049
	3511			phenylcarnitine*	LC/MS pos	43265					0.6		0.0003	0.0001		0.9621	0.5775		100004555	105450-08-6	2629.9	266.139
